# Supplementary material
Source: PubMed Central journal article supplement (PMC7082205)

# Supplementary Fig. 1

**a**

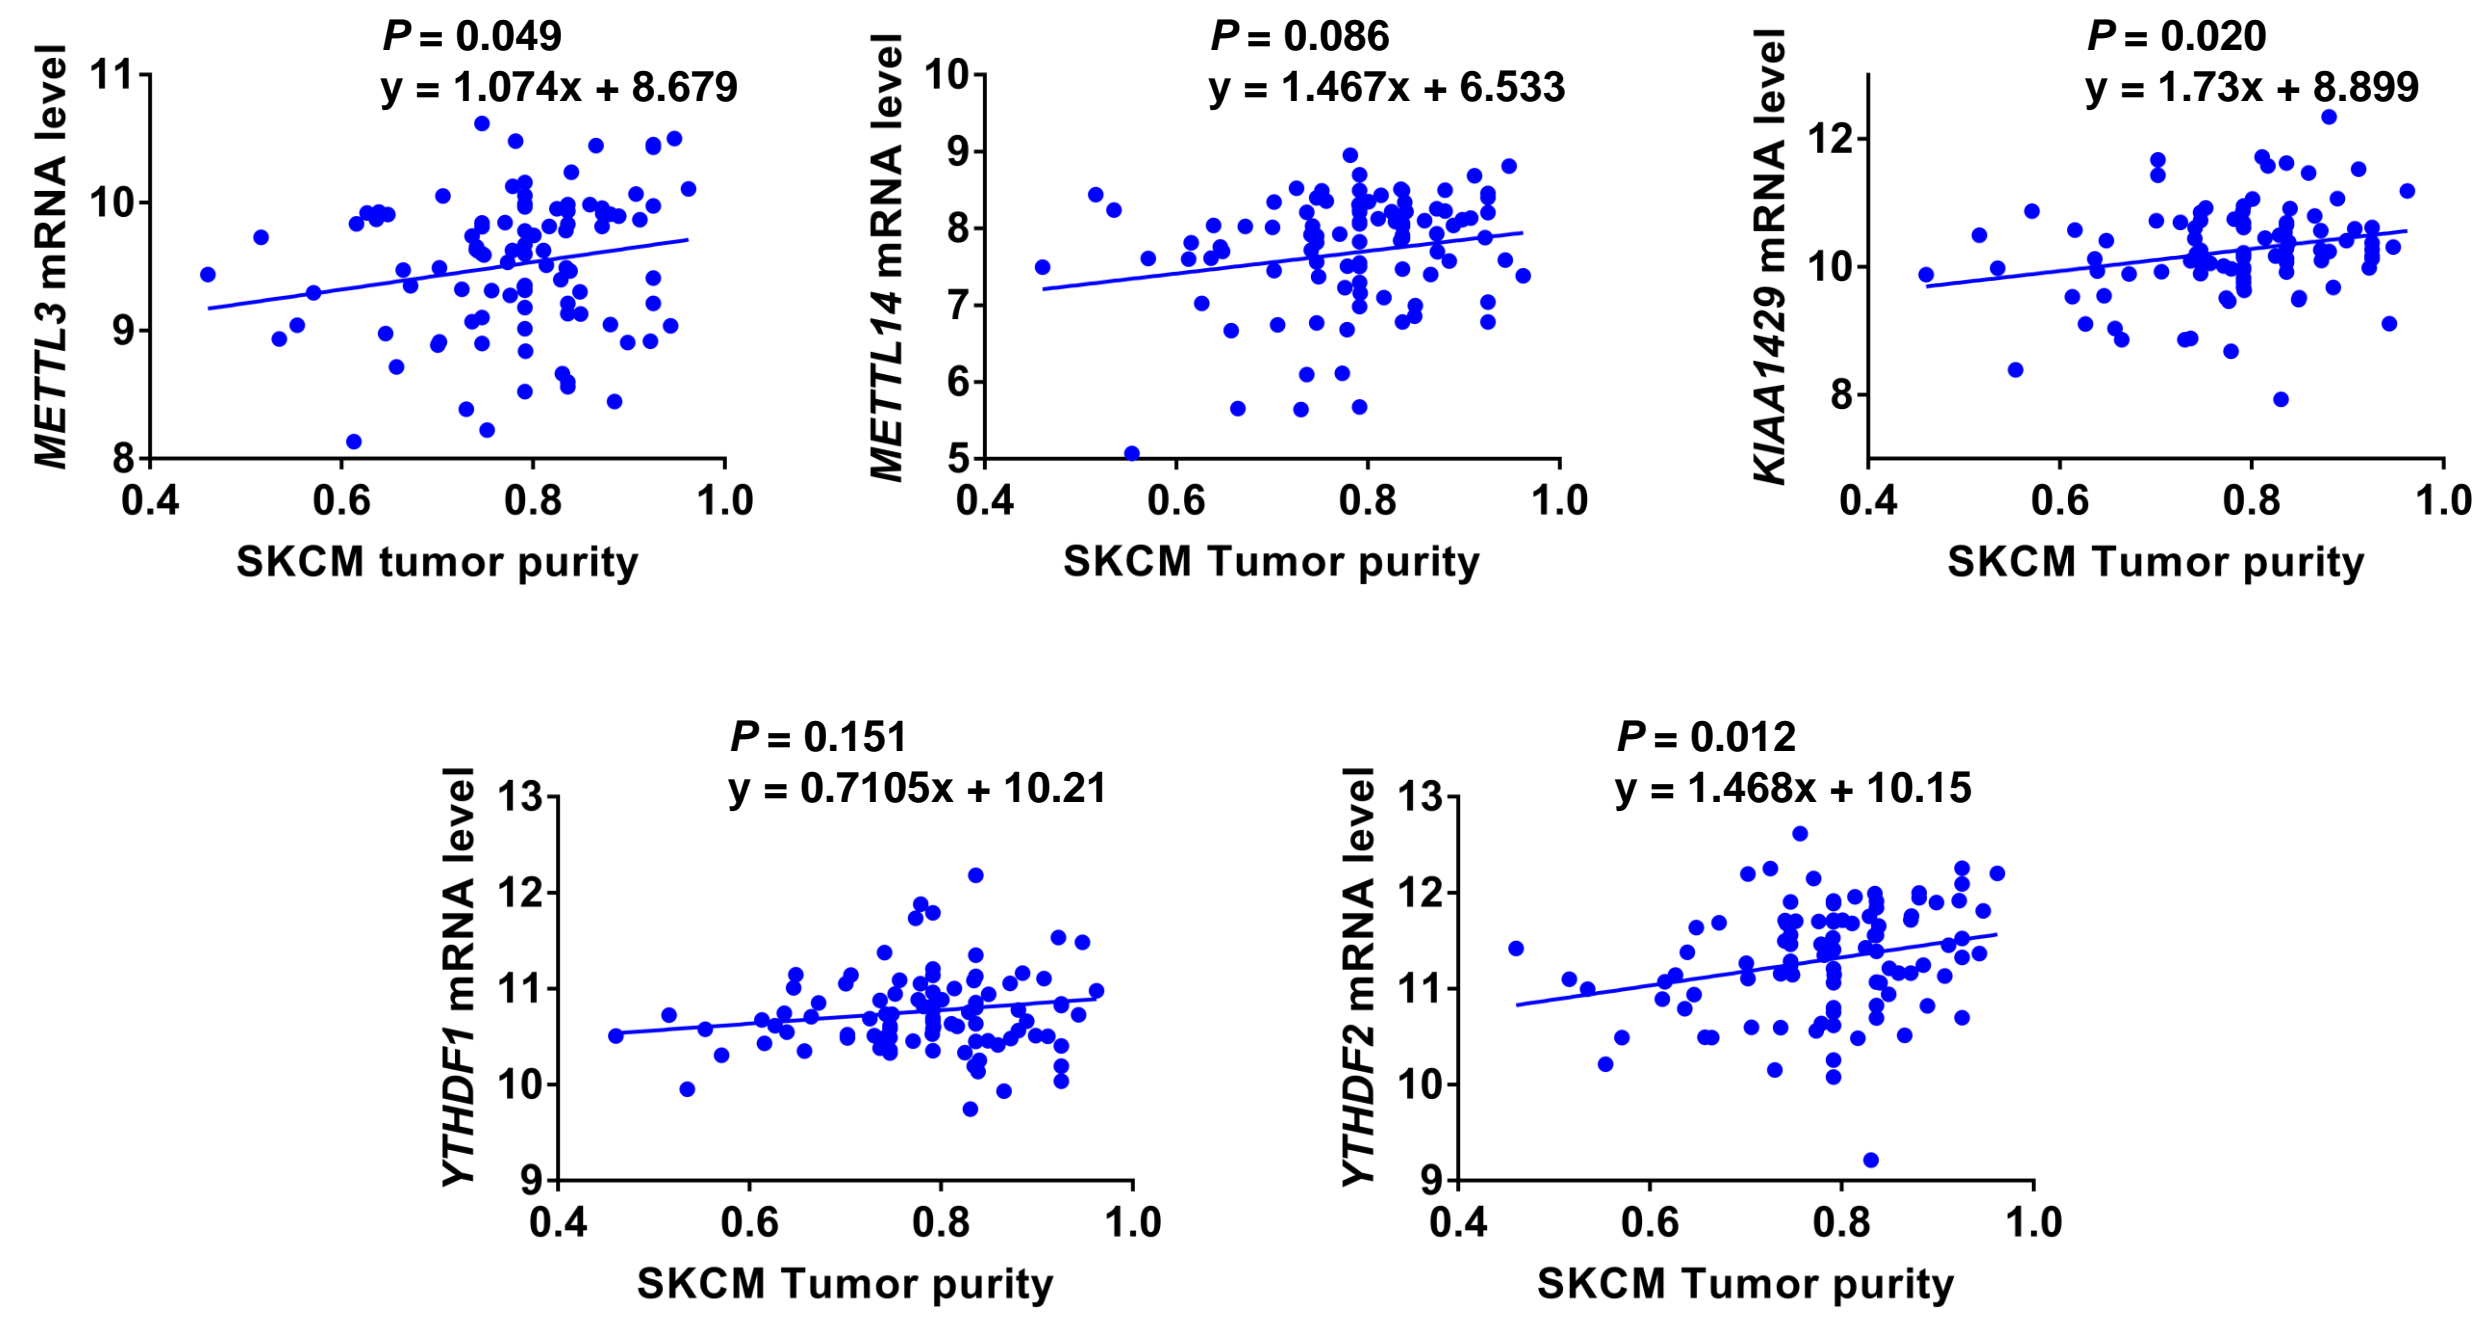

**b**

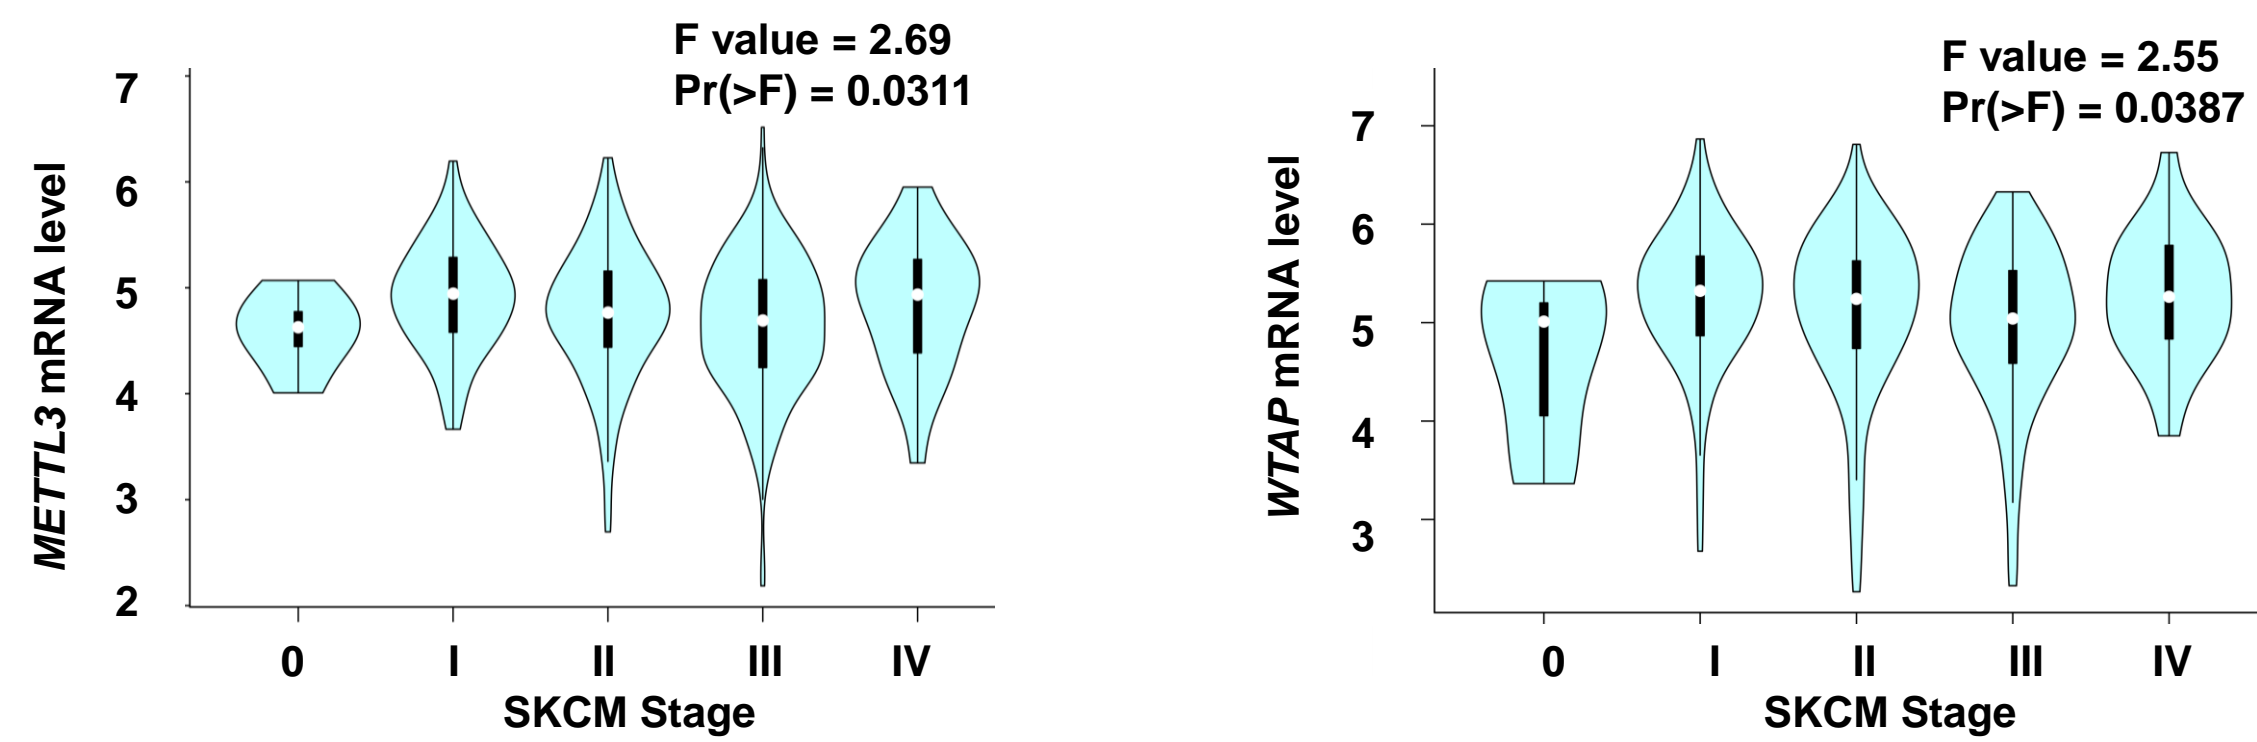

# Supplementary Fig. 2

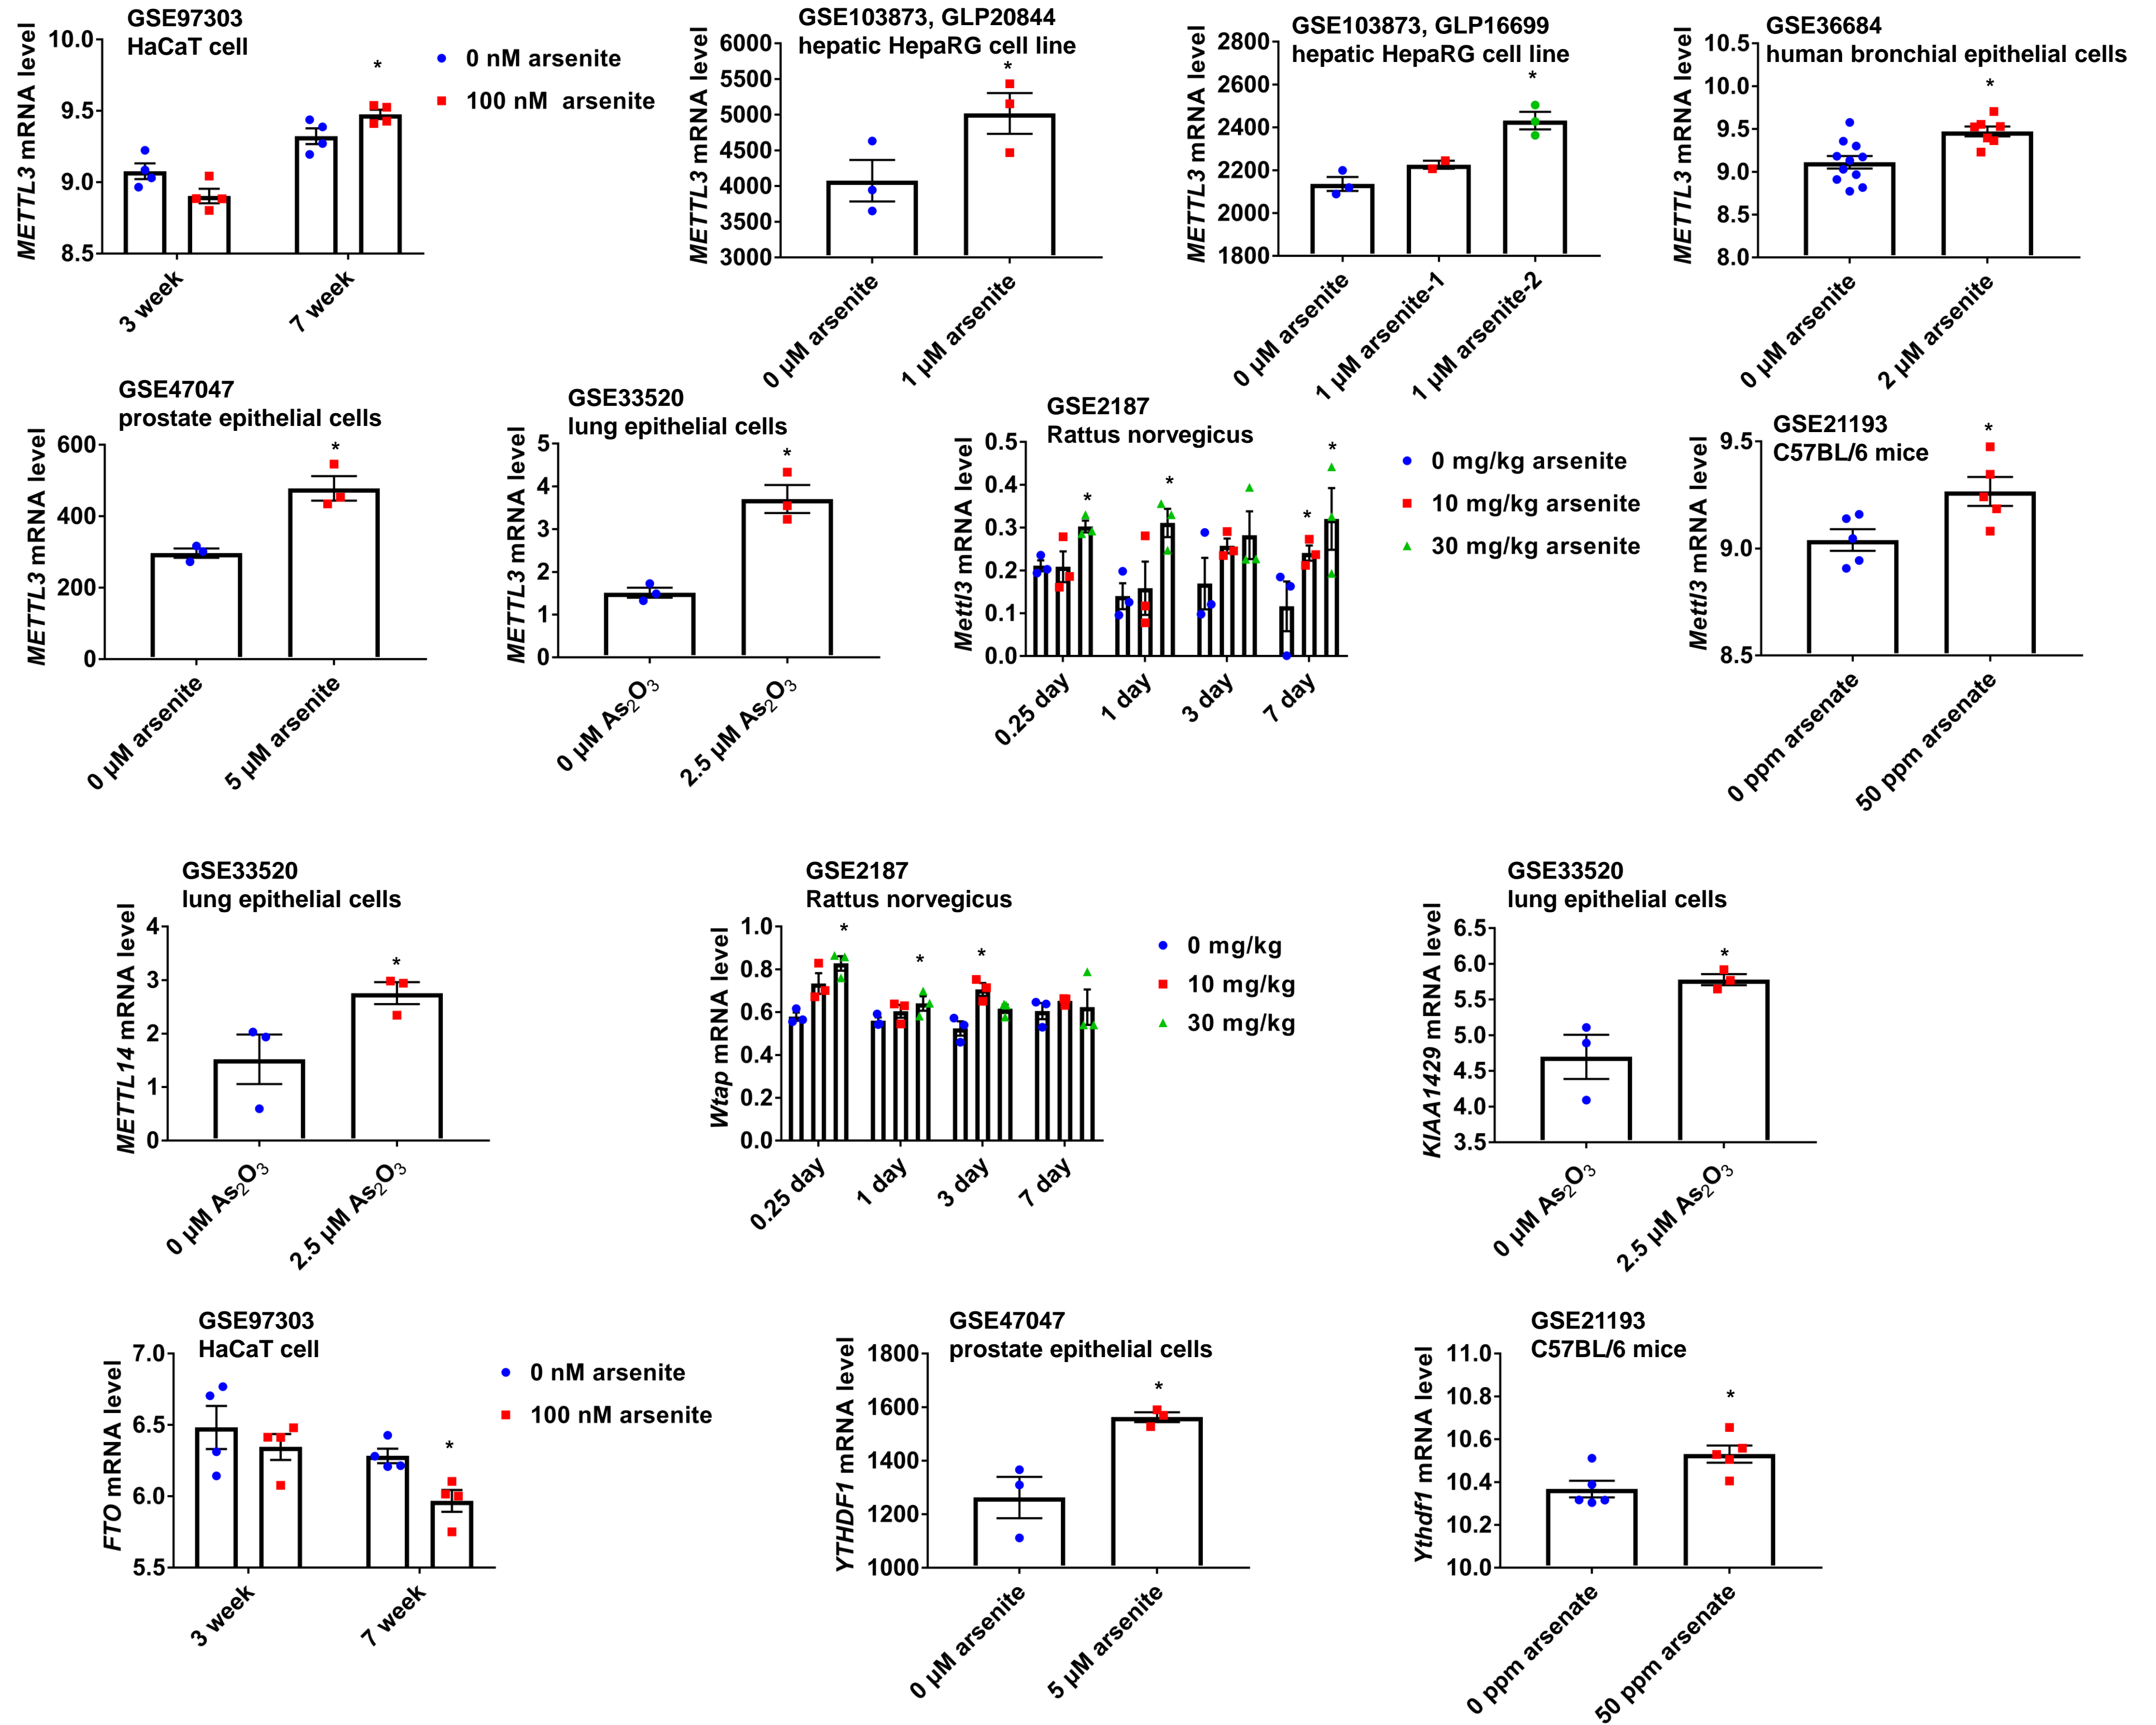

# Supplementary Fig. 3

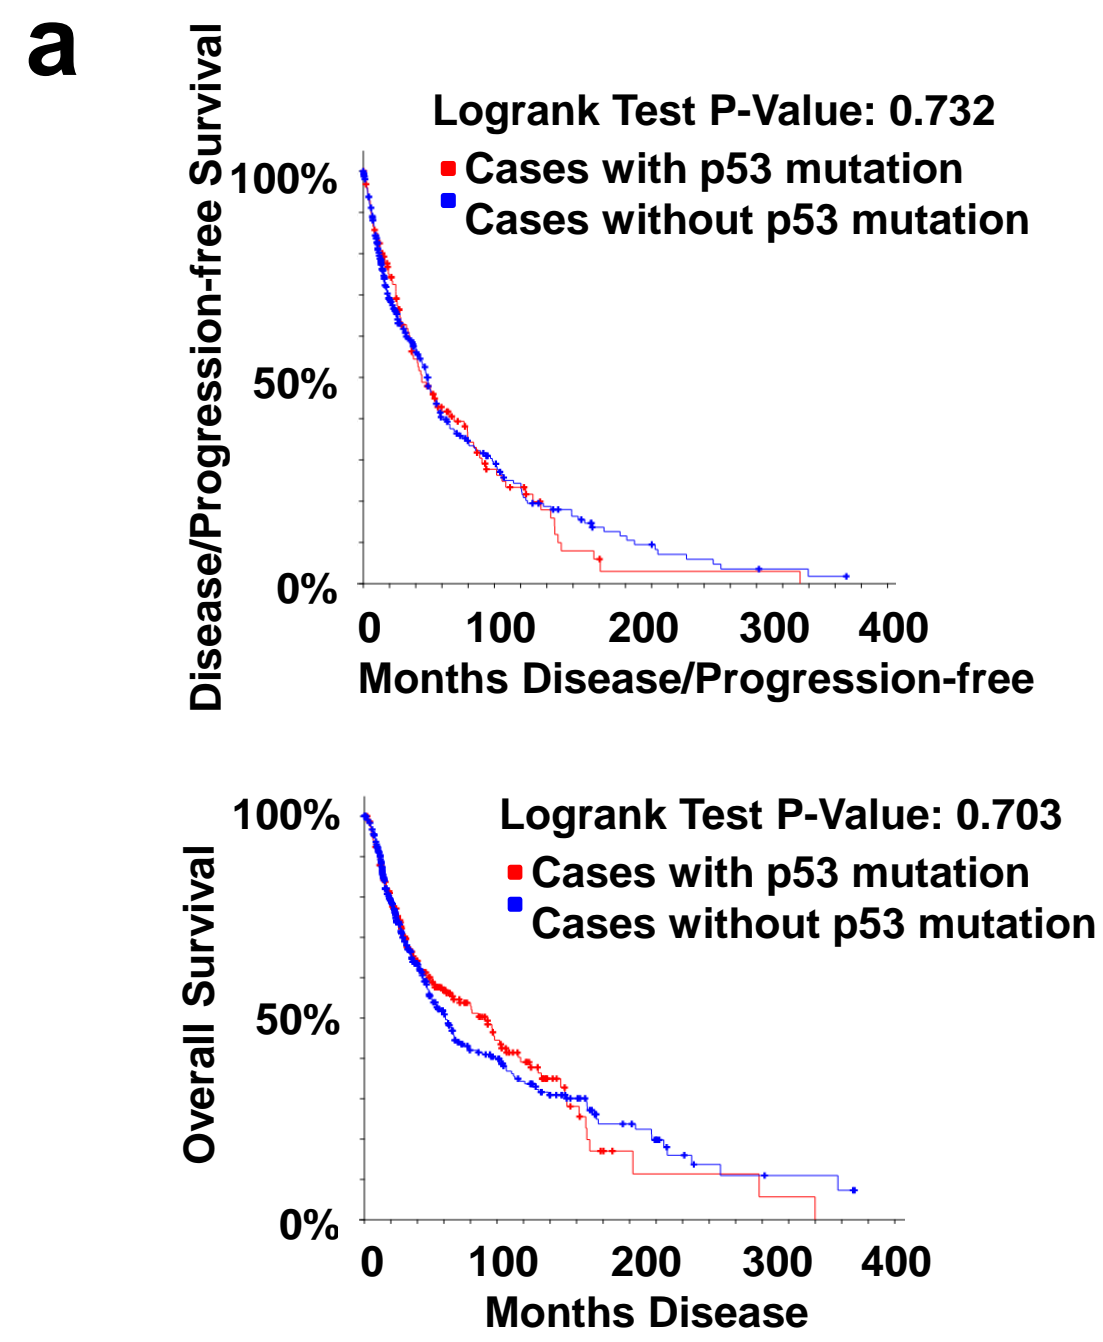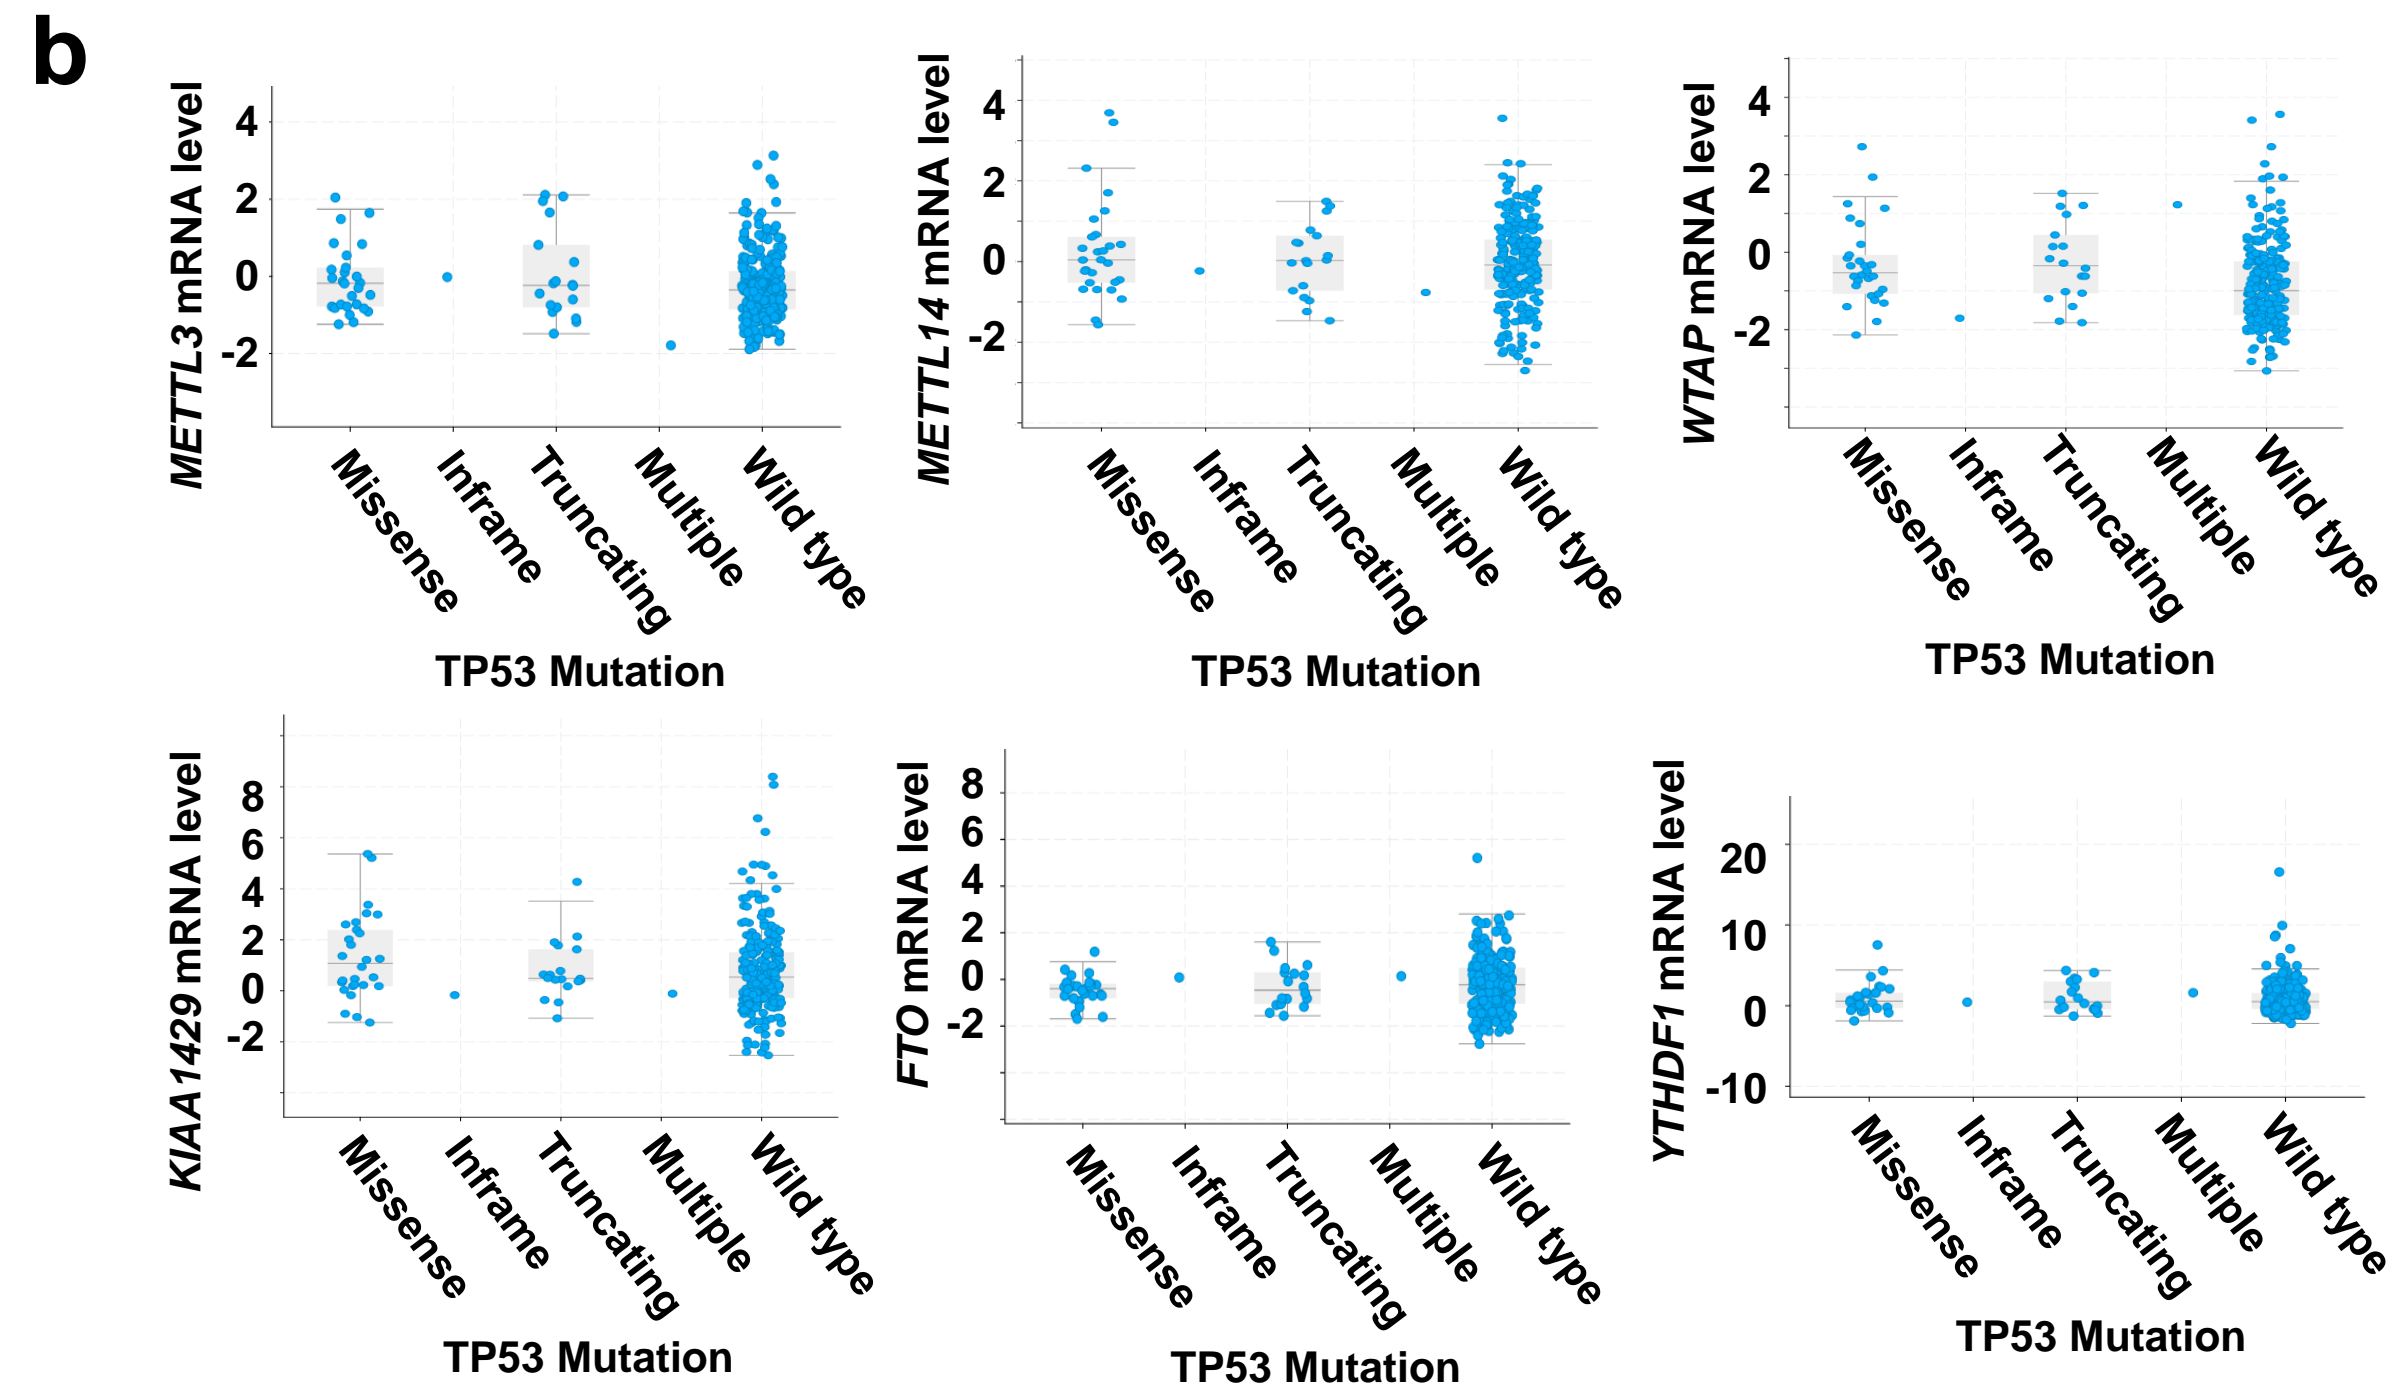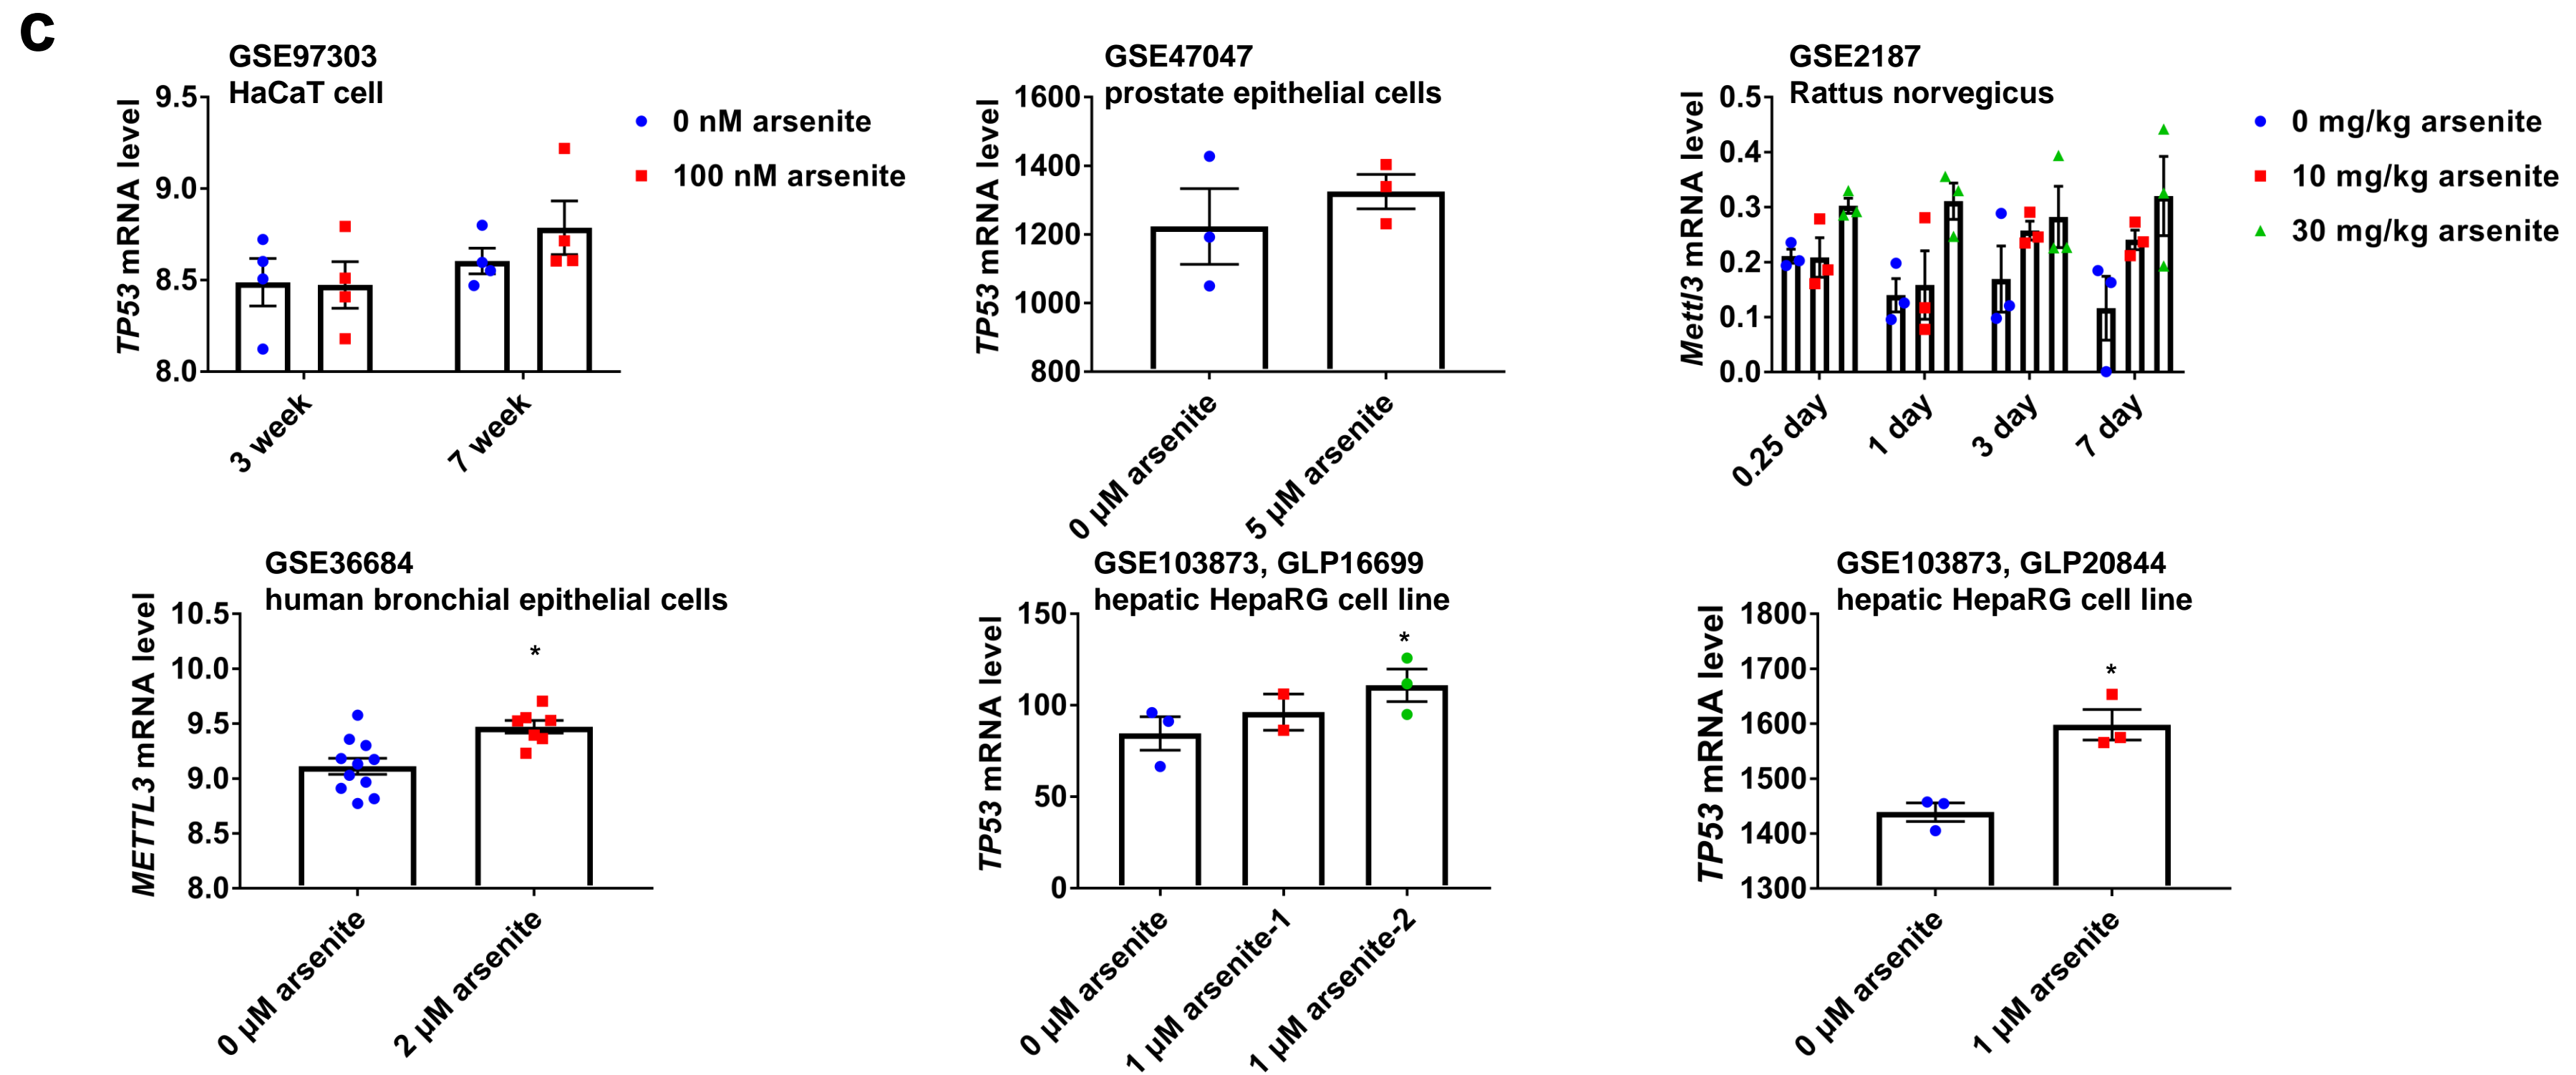

**a**

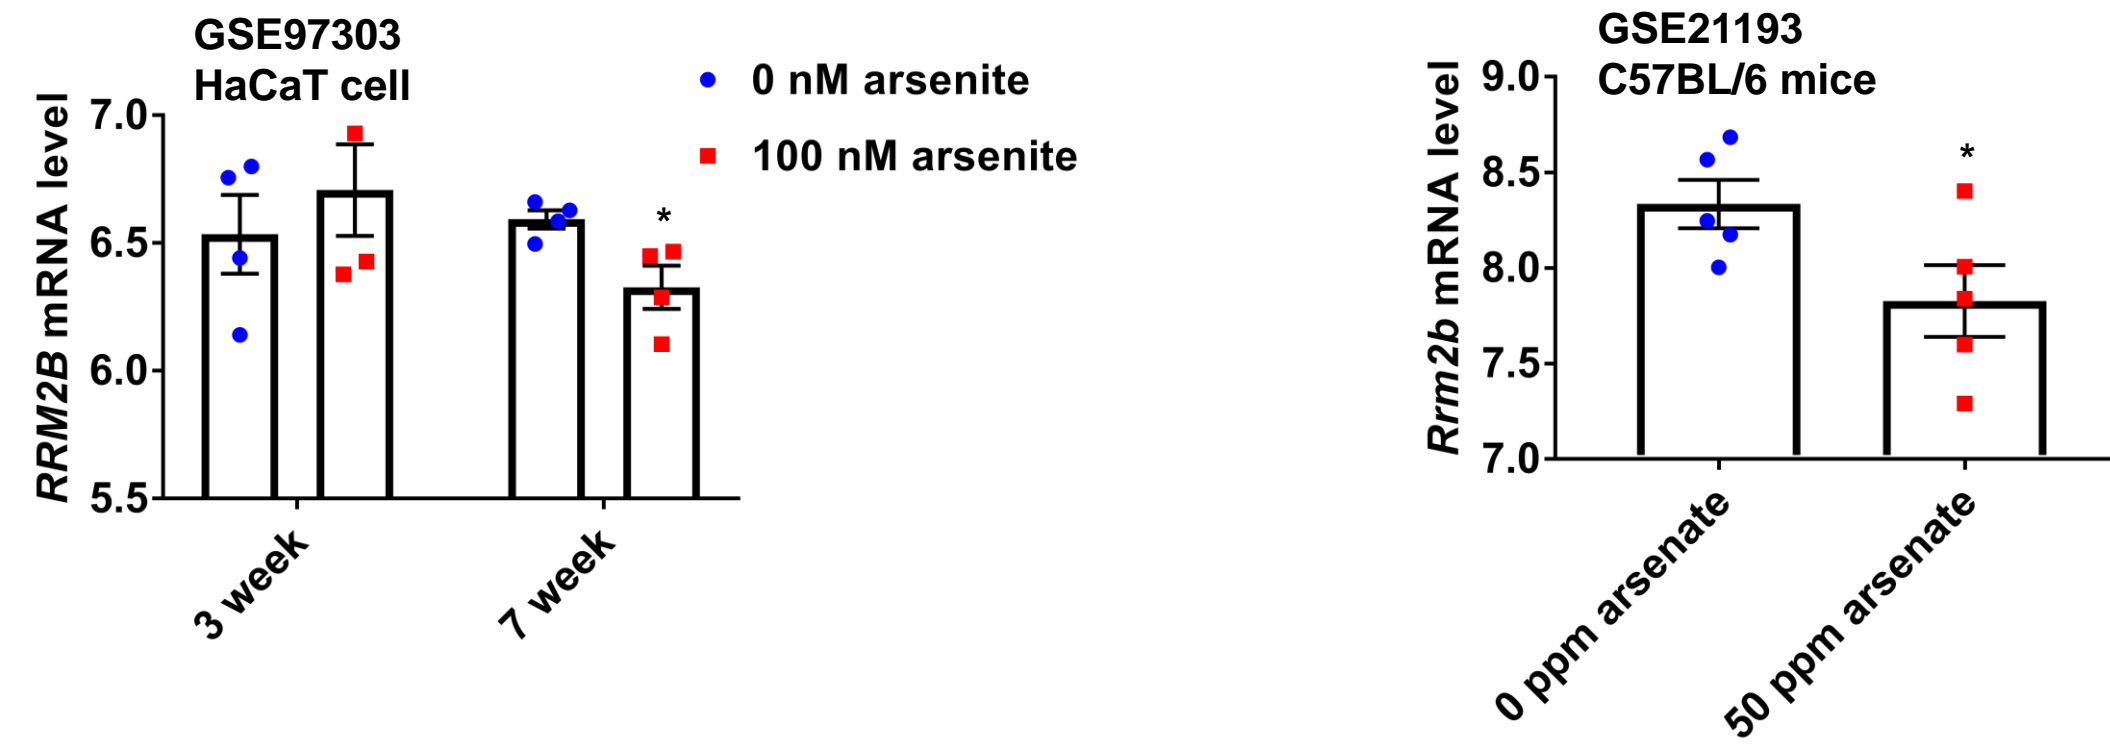

**b**

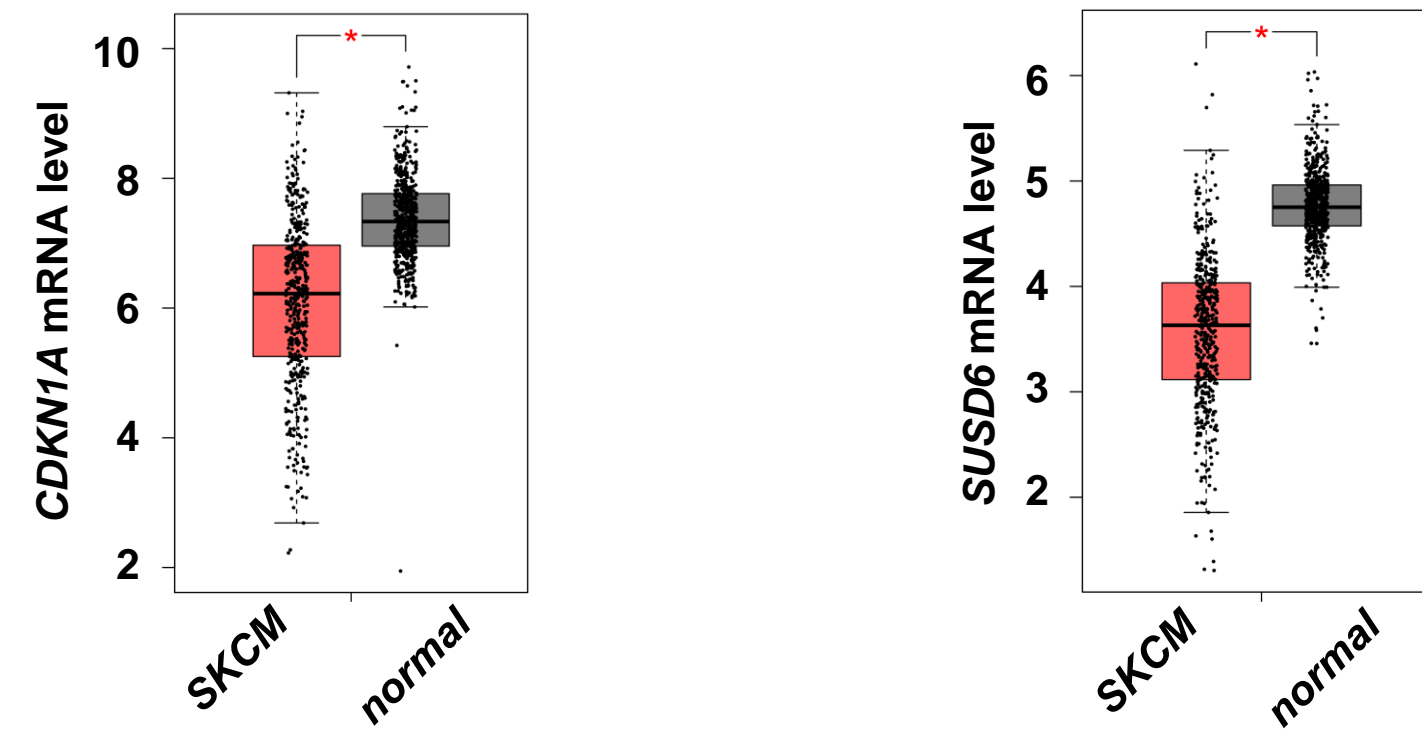

**c**

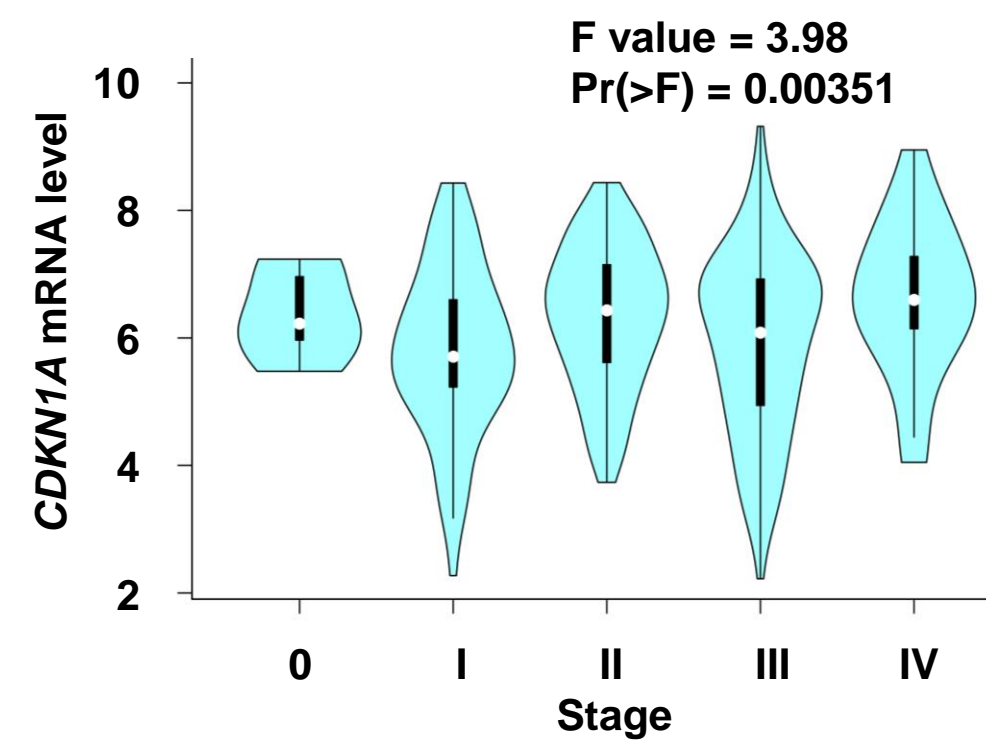

**d**

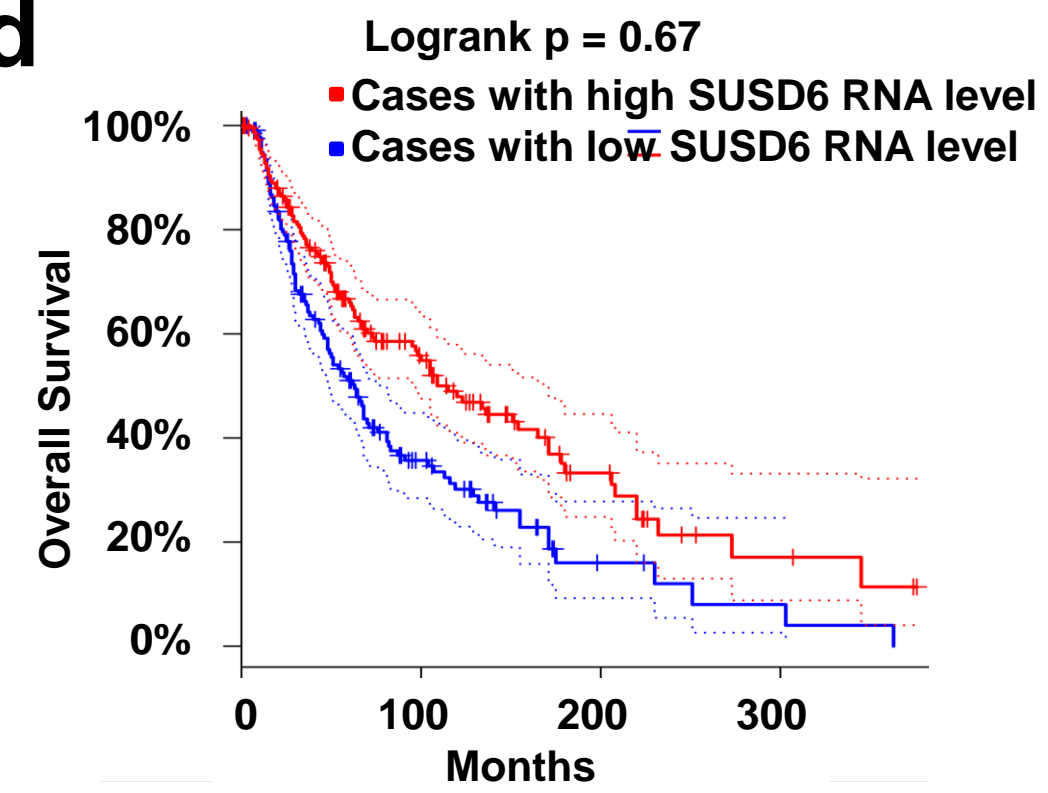



# Supplementary Fig. 5

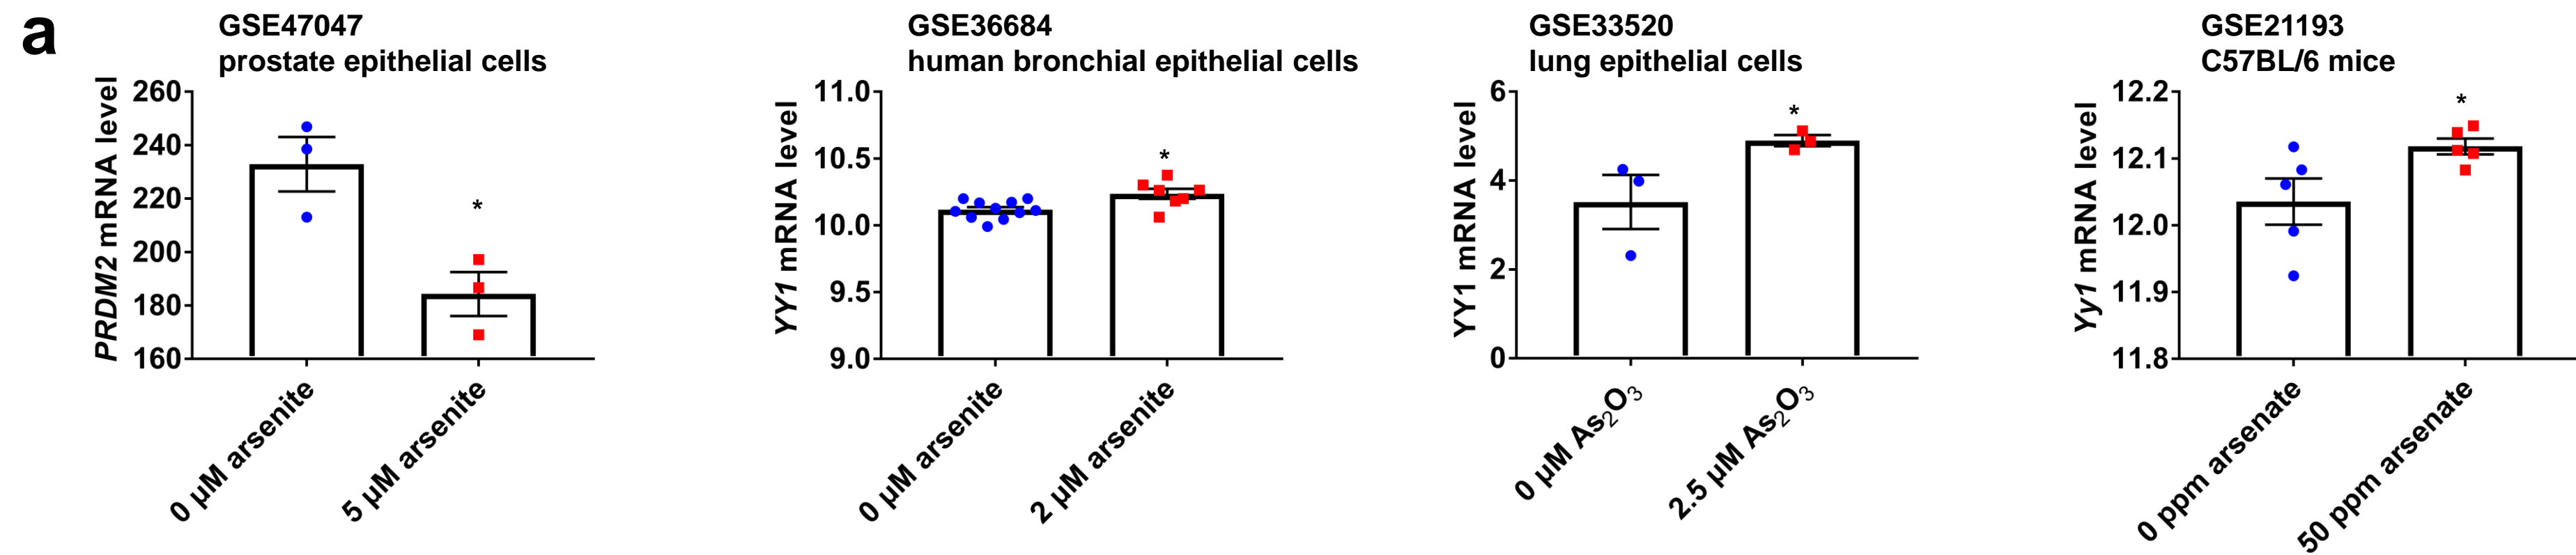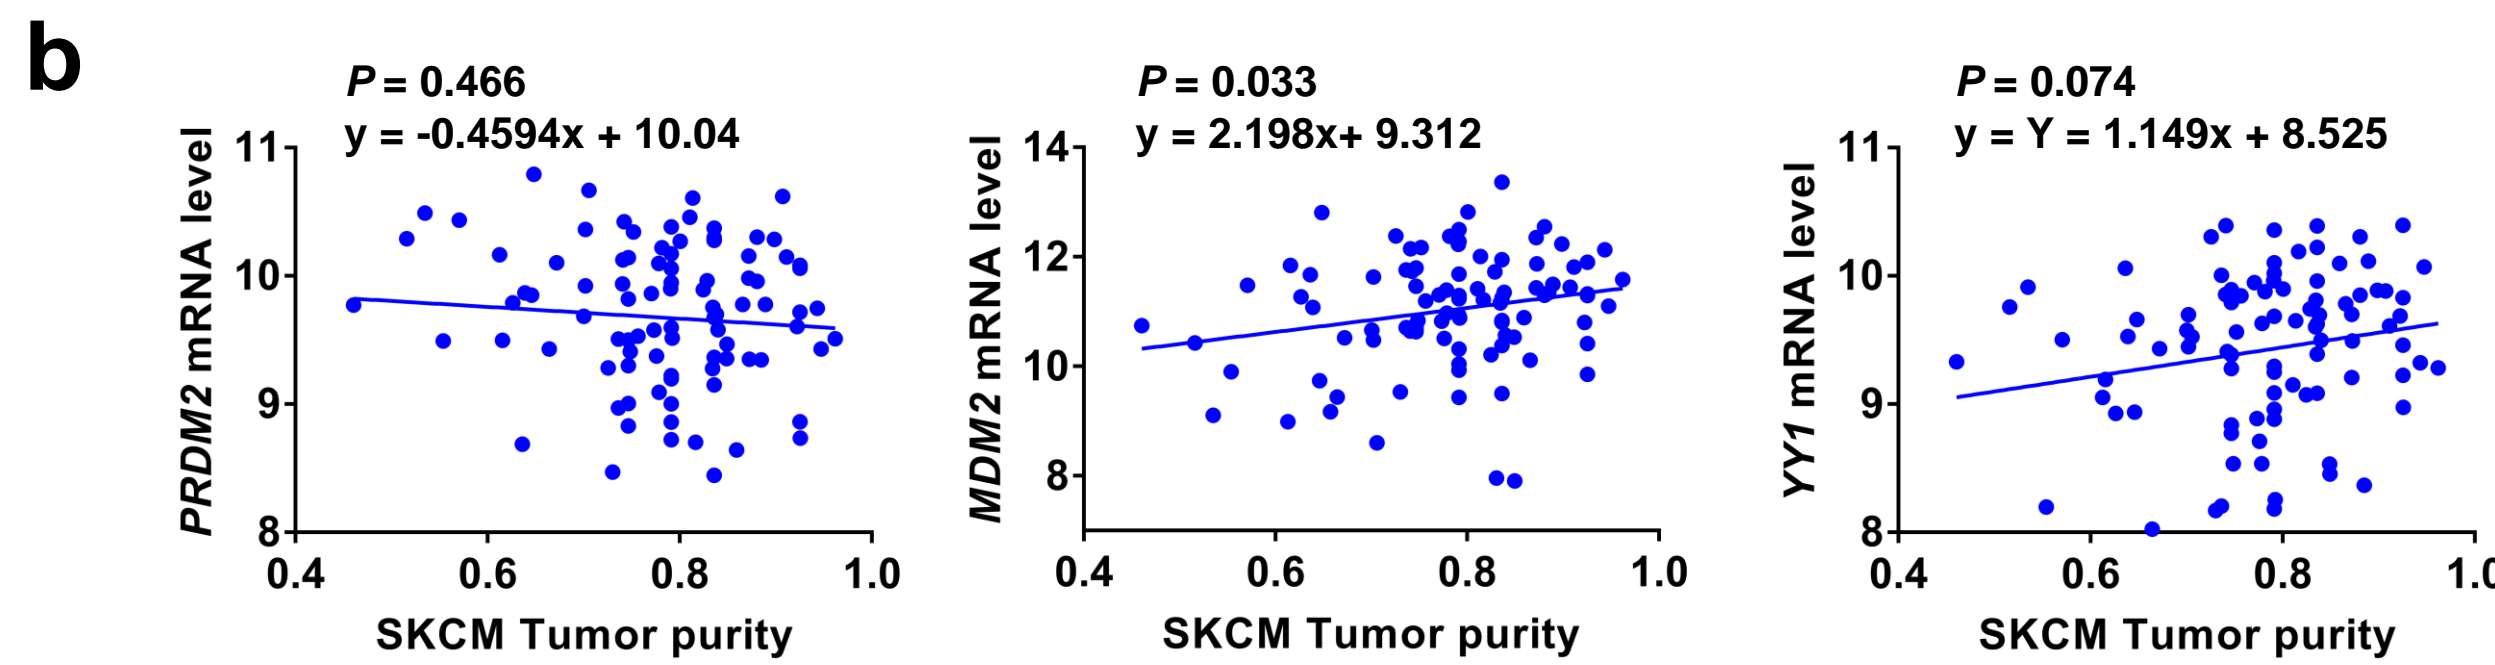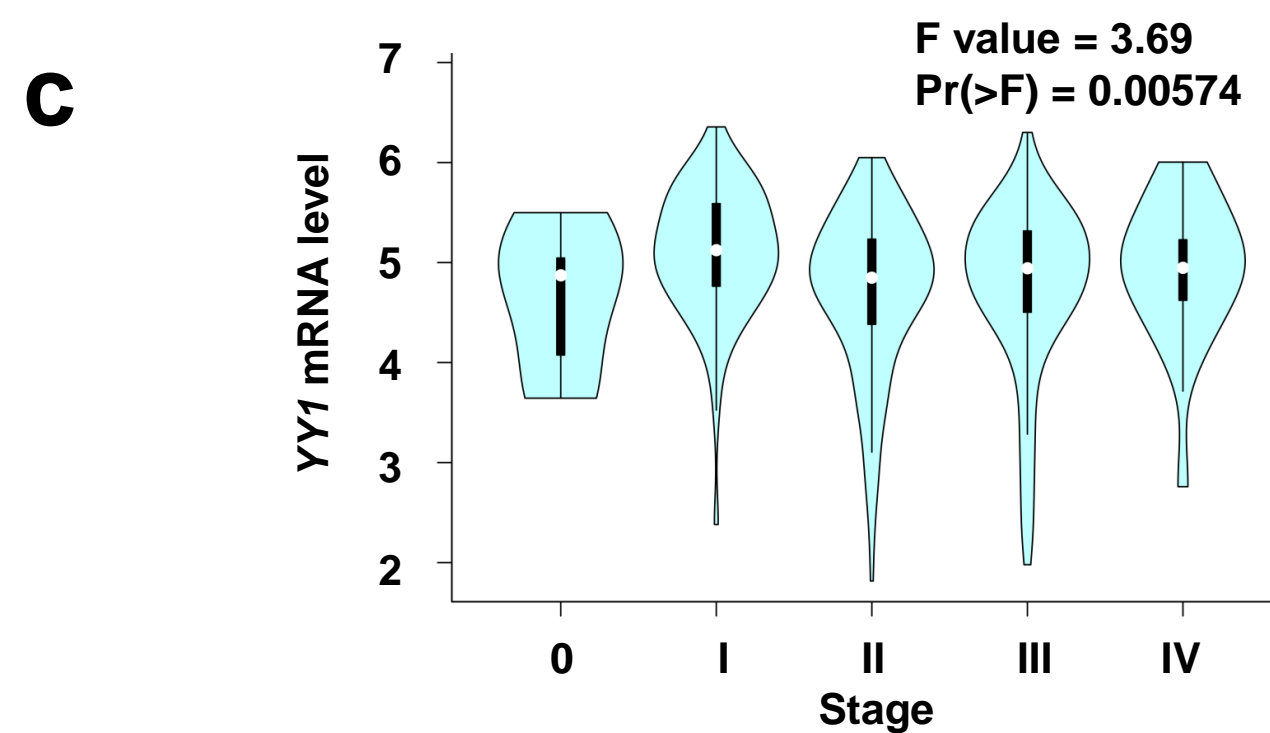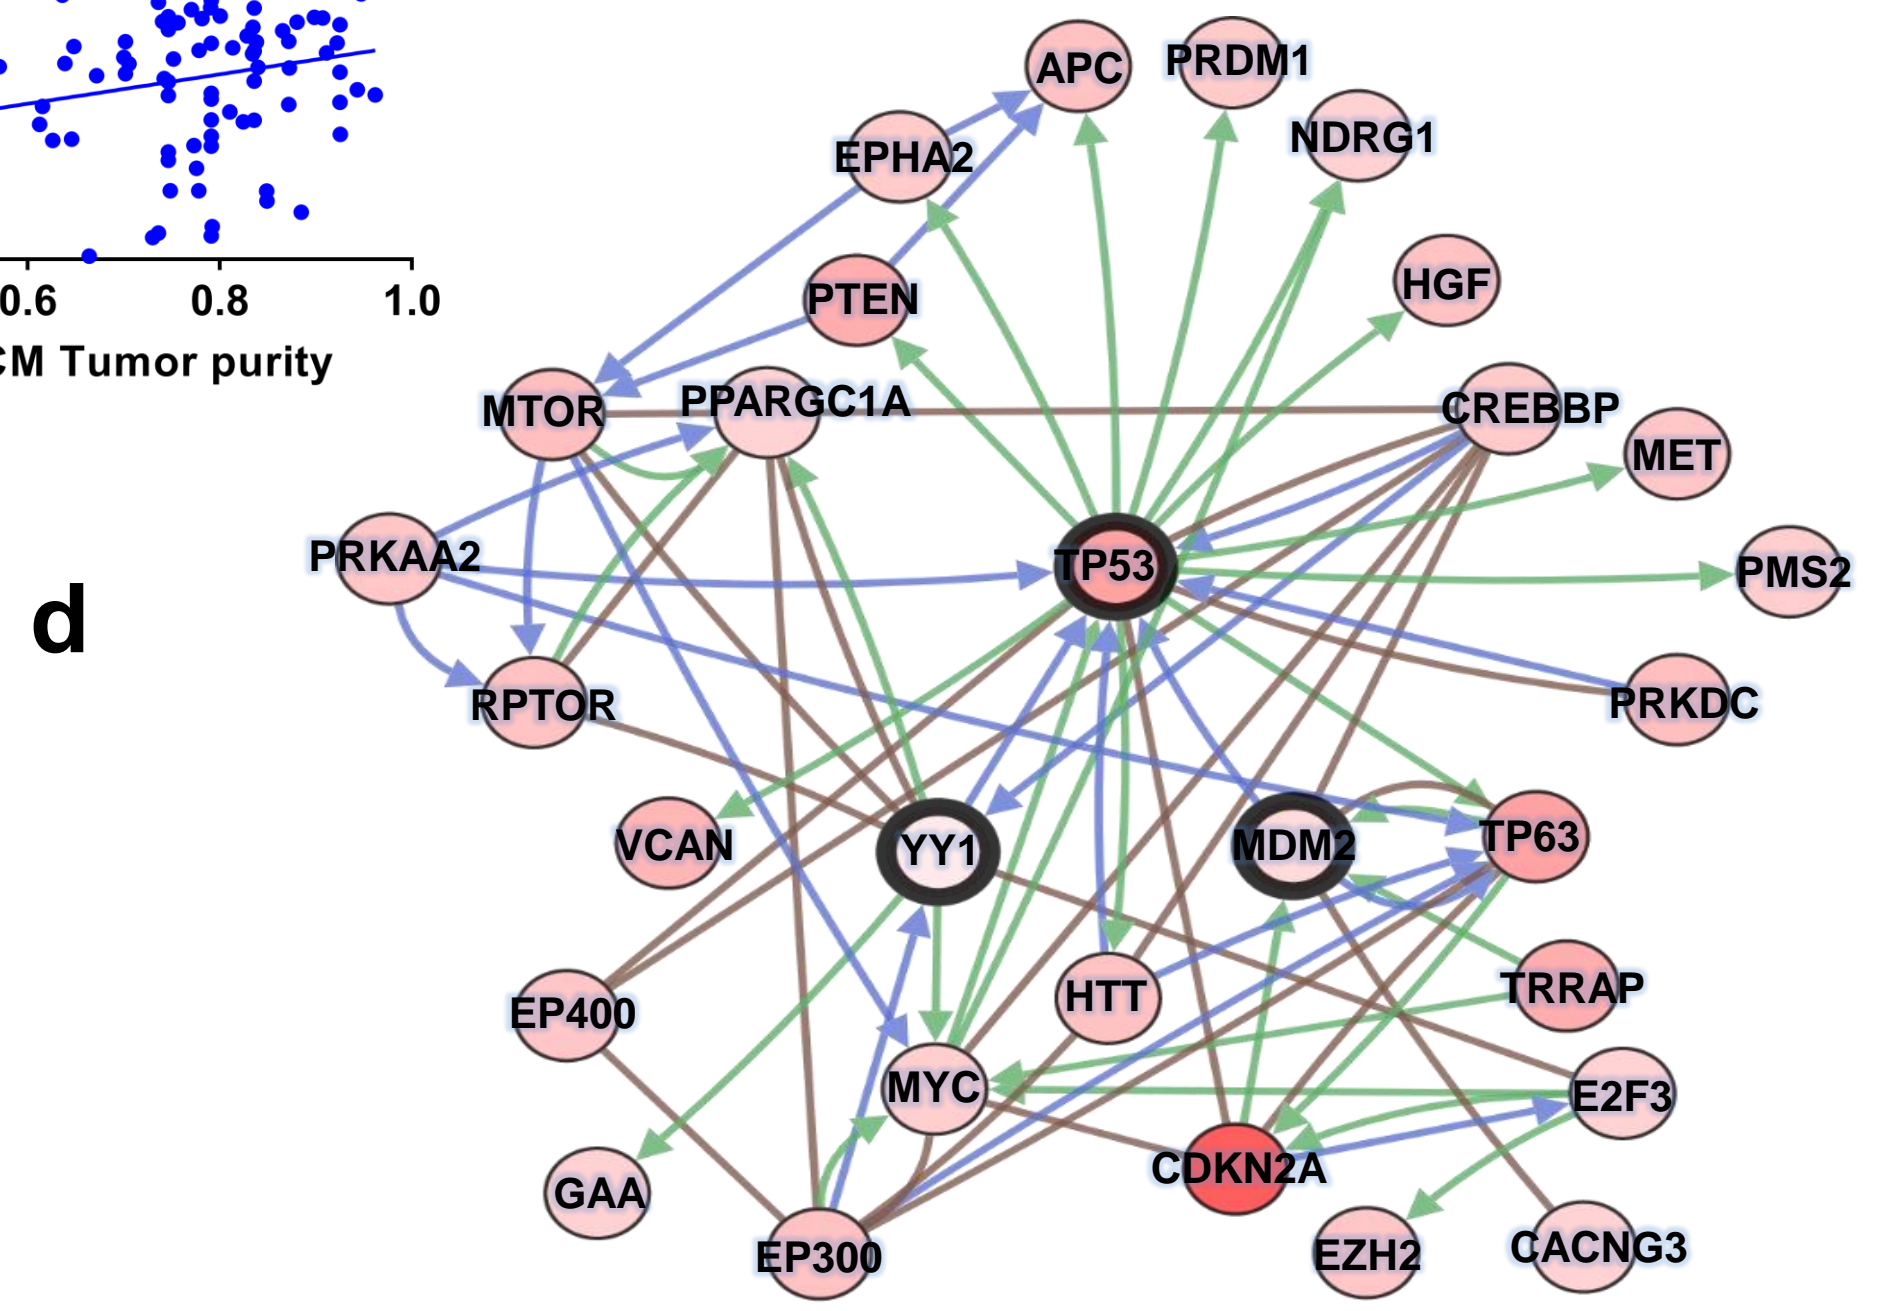

# Supplementary Fig. 6

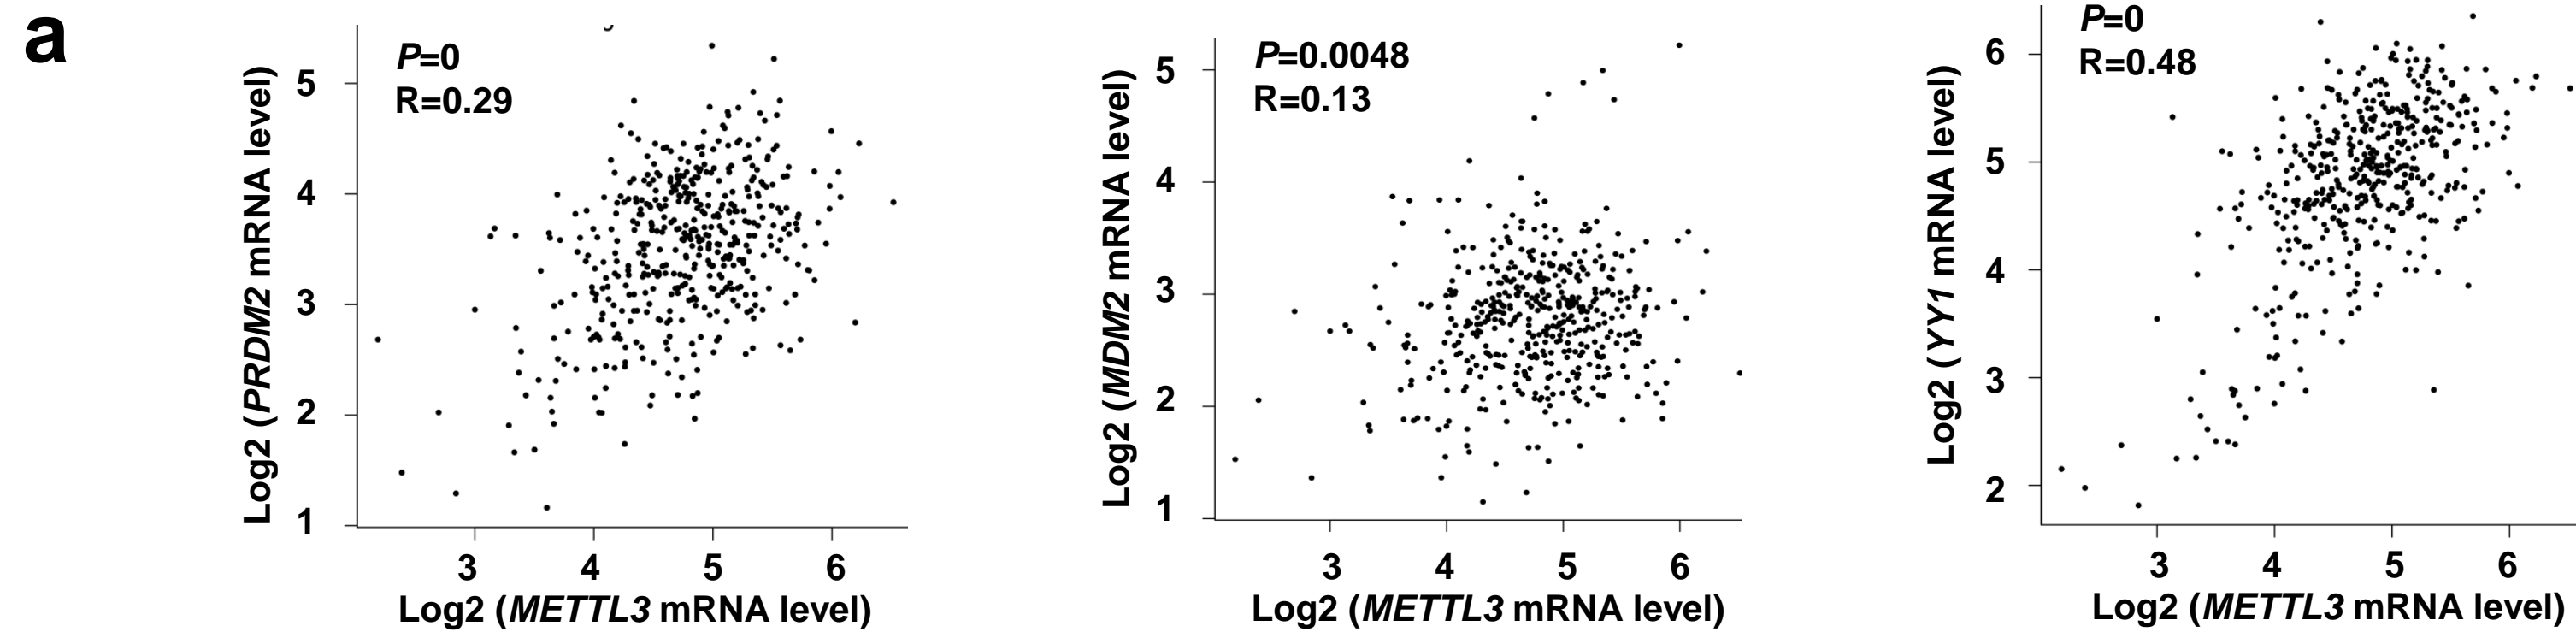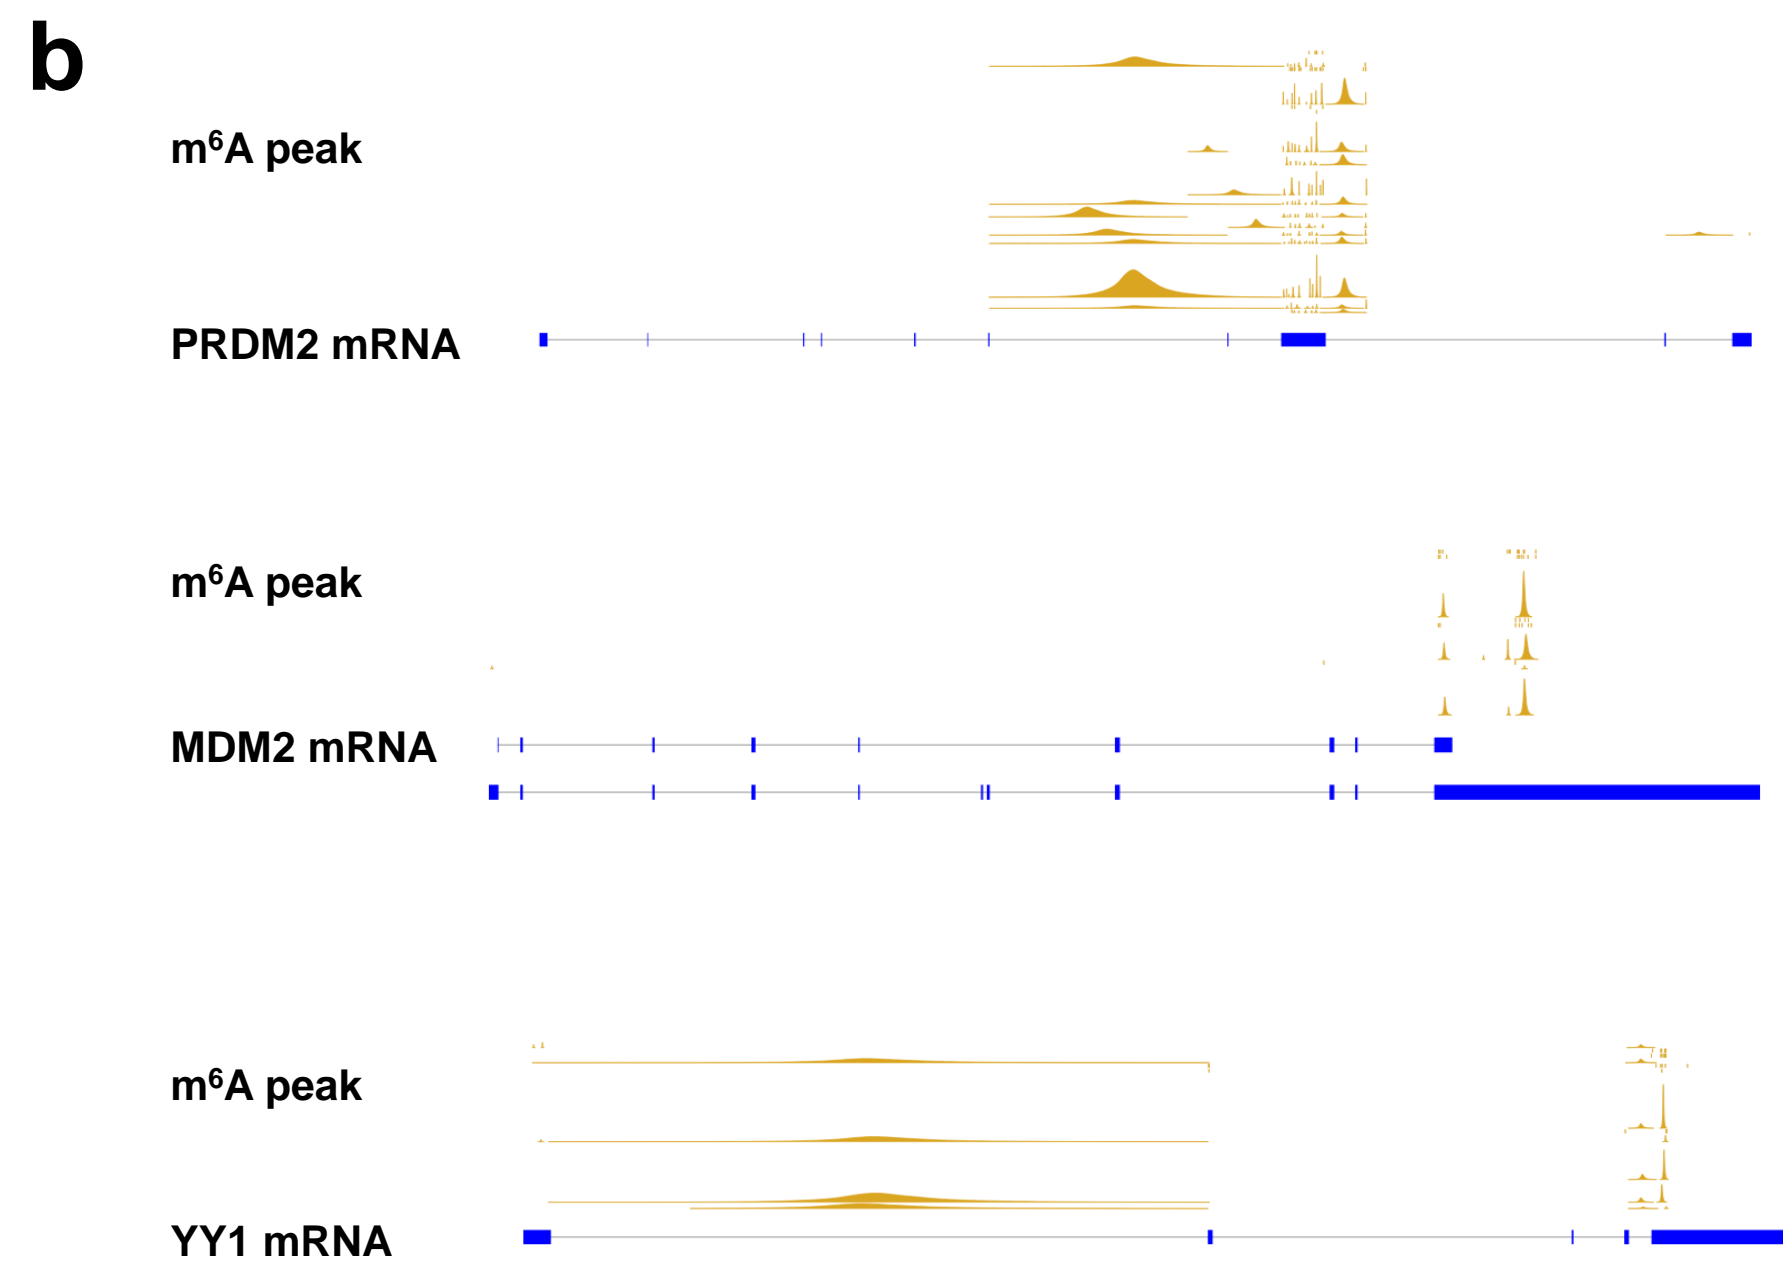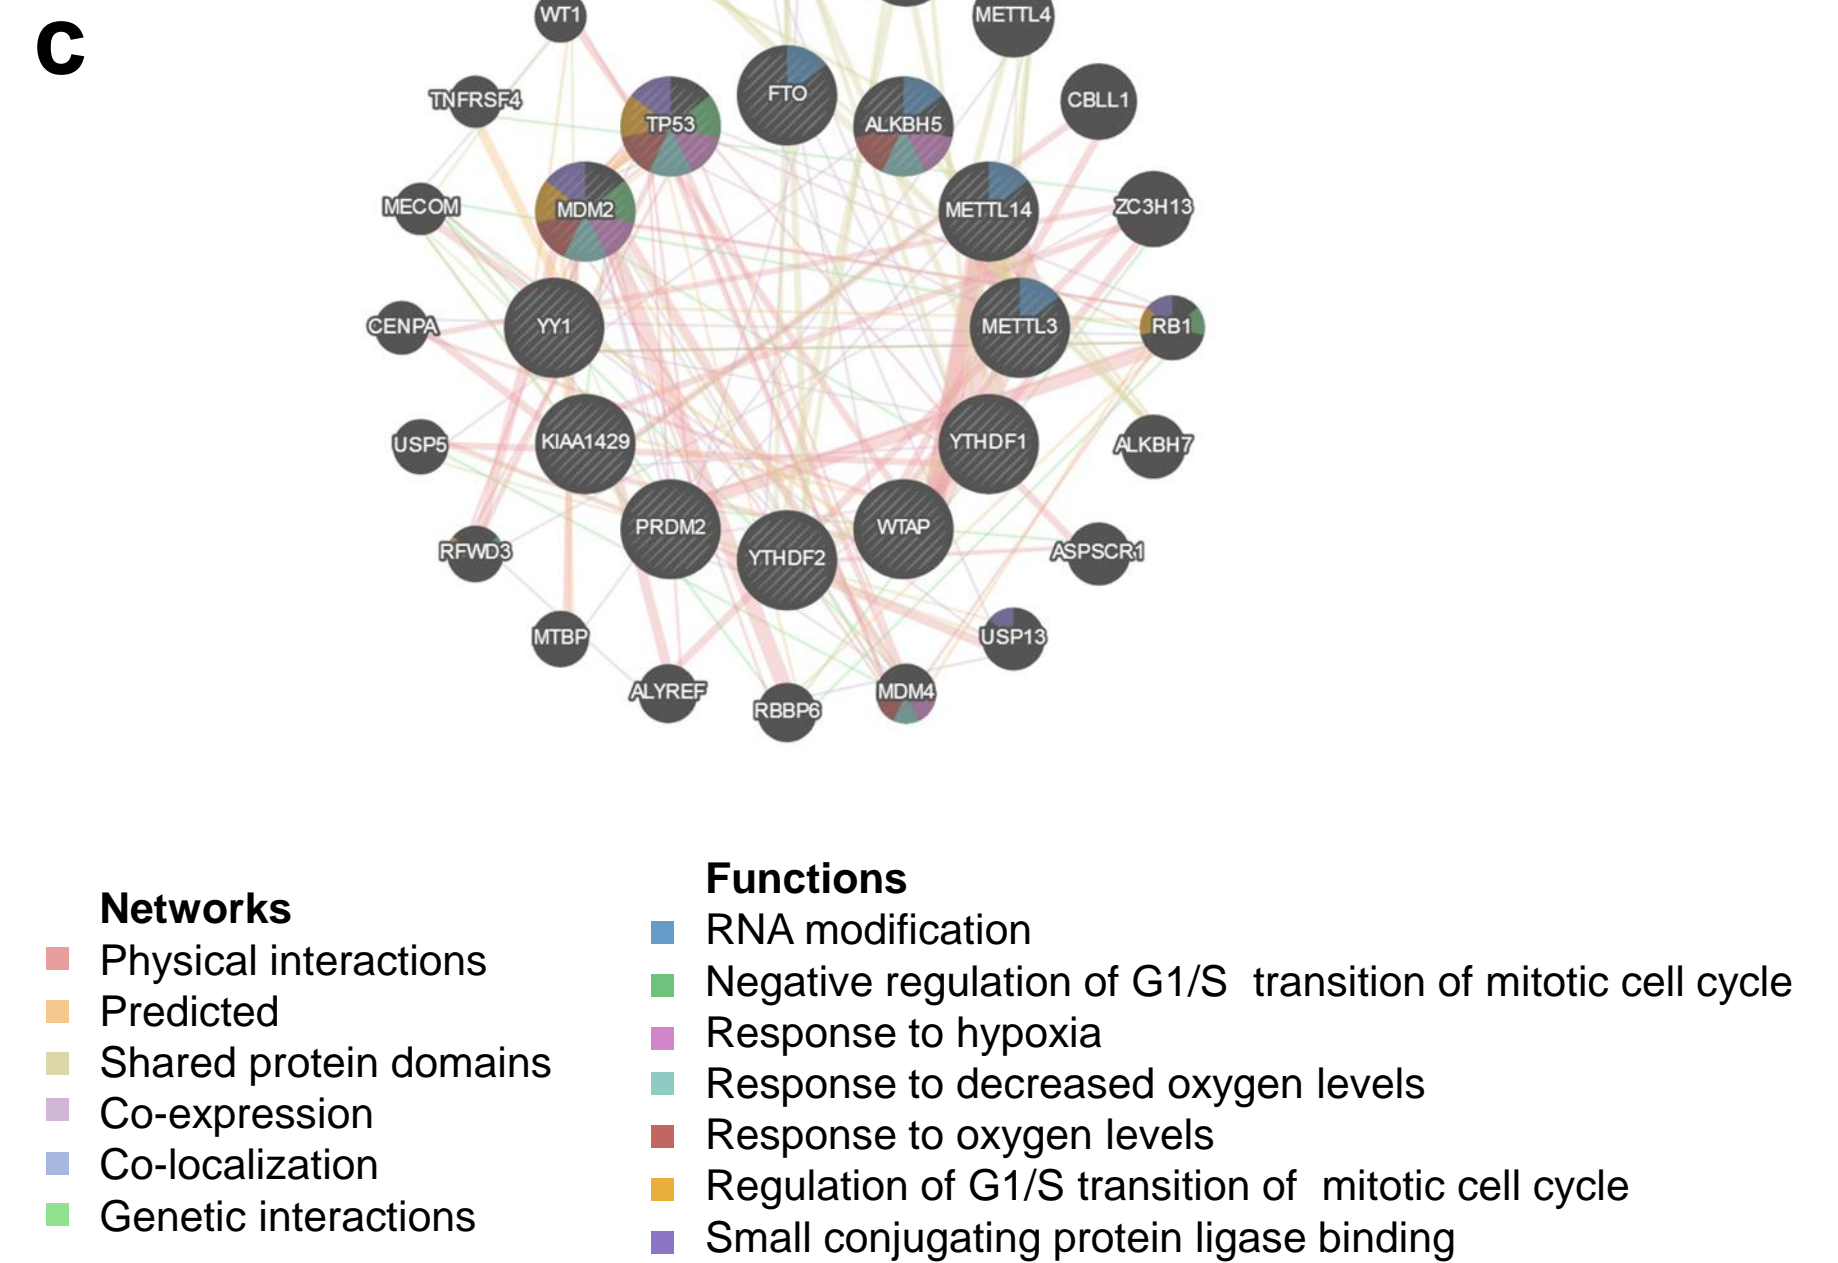

Supplement: NIHMS1549283-supplement-1.pdf [file NIHMS1549283-supplement-1.pdf]
